1     **Reactivation of TAp73 tumor suppressor by protoporphyrin IX, a metabolite of**  
2             **aminolevulinic acid, induces apoptosis in TP53-deficient cancer cells.**

3     Alicja Sznarkowska<sup>1</sup>, Anna Kostecka<sup>1</sup>, Anna Kawiak<sup>1</sup>, Pilar Acedo<sup>2</sup>, Mattia Lion<sup>3\*</sup>,  
4                             Alberto Inga<sup>3</sup> and Joanna Zawacka-Pankau<sup>2,&</sup>

5     <sup>1</sup>Department of Biotechnology, Intercollegiate Faculty of Biotechnology, University  
6     of Gdansk and Medical University of Gdansk, Abrahama 58, 80-307 Gdansk, Poland

7     <sup>2</sup>Department of Microbiology, Tumor and Cell Biology, Karolinska Institutet,  
8     Biomedicum, Solnavägen 9, 171 65, Stockholm, Sweden

9     <sup>3</sup>Centre for Integrative Biology, CIBIO, University of Trento, via Sommarive 9,  
10    38123, Trento, Italy

11    [alicja.sznarkowska@ug.gda.pl](mailto:alicja.sznarkowska@ug.gda.pl),                             [anna.kostecka@gumed.edu.pl](mailto:anna.kostecka@gumed.edu.pl),  
12    [anna.kawiak@biotech.ug.edu.pl](mailto:anna.kawiak@biotech.ug.edu.pl), [p.nunez@ucl.ac.uk](mailto:p.nunez@ucl.ac.uk), [lion@molbio.mgh.harvard.edu](mailto:lion@molbio.mgh.harvard.edu),  
13    [alberto.inga@unitn.it](mailto:alberto.inga@unitn.it)

14    &correspondence: [joannazawackapankau1@gmail.com](mailto:joannazawackapankau1@gmail.com)

15    **Footnotes:**

16    \*current affiliation: Department of Molecular Biology, Massachusetts General  
17    Hospital, Boston, MA 02114 and Department of Genetics, Harvard Medical School,  
18    Boston, MA 02115

19

20    **Key words:** TAp73, protoporphyrin IX, apoptosis, yeast-based assay, MDM2,  
21    MDMX, Itch

1 **Abstract**

2 Background

3 The p73 protein is a tumor suppressor that shares structural and functional similarity  
4 with p53. p73 is expressed in two major isoforms; the TA isoform that interacts with  
5 p53 pathway, thus acting as tumor suppressor and the N-terminal truncated  $\Delta N$   
6 isoform that inhibits TAp73 and p53 and thus, acts as an oncogene.

7 Results

8 By employing a drug repurposing approach, we found that protoporphyrin IX (PpIX),  
9 a metabolite of aminolevulinic acid (ALA) applied in photodynamic therapy of  
10 cancer, stabilizes TAp73 and activates TAp73-dependent apoptosis in cancer cells  
11 lacking p53. The mechanism of TAp73 activation is *via* disruption of TAp73/MDM2  
12 and TAp73/MDMX interactions and inhibition of TAp73 degradation by ubiquitin  
13 ligase Itch.

14 Conclusion

15 Our findings may in future contribute to the successful repurposing of PpIX into  
16 clinical practice.

17

## 1 **Background**

2 Drug repurposing brings hope for the improved treatment of cancer patients due to the  
3 financial toxicity of current cancer care that impacts both, patient care and healthcare  
4 system worldwide[1].

5 p73 and p63 are structural and functional homologs of the p53 tumor suppressor  
6 protein. All p53 family proteins share the ability to activate p53 target genes involved  
7 in apoptosis and cell cycle control under stress conditions.

8 The *TP73* gene structure is complex due to the existence of two alternative promoters  
9 (P1 and P2). The P1 promoter drives the expression of transcriptionally active TAp73  
10 isoforms, acting as tumor suppressors, while expression from P2 promoter generates  
11 N-terminal truncated  $\Delta$ Np73 isoforms, acting as dominant negative towards TA  
12 isoforms and p53 proteins, and thus known as oncogenes[2]. It has been shown that  
13 TA and  $\Delta$ N isoforms possess distinct, often opposing functions in healthy and  
14 cancerous tissues[3]. Next, it has been demonstrated that the outcome of  
15 chemotherapy depends on the TA and  $\Delta$ N isoforms ratio[4].

16 Unlike *TP53*, the gene encoding *TP73* is rarely mutated in cancers and the functional  
17 isoforms are expressed in the majority of human tumors. TAp73 is found inactivated  
18 in cancers by binding to oncogenic  $\Delta$ Np73, MDM2 and MDMX proteins or by  
19 degradation by the ubiquitin ligase Itch[5] [6]. Previous studies point at the possibility  
20 of exploiting TAp73 as a tumor suppressor for improved cancer therapy. For example  
21 it has been demonstrated that p73 *via* activation of c-Jun N-terminal Kinase (JNK)  
22 drives the sensitivity to cisplatin in ovarian cancer cells independent on the p53  
23 status[7]. Next, Nutlin3, a selective inhibitor of MDM2, stabilizes TAp73 and induces

1 TAp73-mediated apoptosis[8]. It has also been demonstrated that simultaneous  
2 induction of proteotoxic and oxidative stress leads to JNK-induced phosphorylation of  
3 TAp73 and TAp73-mediated cell death in p53-null tumors[9].

4 Small molecule protoporphyrin IX (PpIX), is a natural metabolite of  $\delta$  -  
5 aminolevulinic acid, a pro-drug applied in clinics in photodynamic therapy of cancer  
6 (PDT)[10]. PpIX induces HeLa cells' apoptosis *per se*, without light excitation[11],  
7 stabilizes and activates wild-type p53 in human colon carcinoma cells[12] and binds  
8 to p73[13].

9 Here, we have found that PpIX activates TAp73 in cancer cells lacking *TP53*. We  
10 demonstrated that PpIX-activated TAp73 compensates for p53 loss in cancer cells and  
11 induces apoptosis. The mechanism of transcriptional activation of TAp73 by PpIX is  
12 *via* inhibition of TAp73/MDM2 and TAp73/MDMX interactions. TAp73 protein  
13 stabilization is achieved by disrupting TAp73/Itch complex by PpIX.

14

15

16

17

18

19

20

## 1 **Results**

### 2 **Protoporphyrin IX inhibits proliferation and induces apoptosis in *TP53*-null** 3 **cancer cells**

4 It has been demonstrated that PpIX *per se*, activates wild-type p53 by disrupting  
5 p53/MDM2 complex and induces p53-dependent and independent apoptosis in human  
6 colon cancer cells[12]. Since PpIX binds to p73[13] we reasoned that p73 might play  
7 role in mediating cell death in p53-null cancer cells upon PpIX treatment. Here, in  
8 long-term proliferation assay, we showed that PpIX inhibits growth of several *TP53*-  
9 null cancer cells in a dose-dependent way (Figure 1a). Interestingly, overexpression of  
10 TAp73 $\alpha$  sensitized cancer cells to PpIX as shown in short- and long-term proliferation  
11 assays (Figure 1b,c). Thus accumulated TAp73 contributed to cancer cells'  
12 susceptibility to PpIX.

13 Next, we assessed the genotoxicity of PpIX. The comet assay showed that PpIX did  
14 not induce DNA damage in human colon cancer cells (Figure 1d,e) at effective  
15 concentrations. Importantly, western blotting demonstrated PARP-1 cleavage,  
16 indicating active apoptosis, only in cancer cells but not in normal human diploid  
17 fibroblasts (NHDF) after protoporphyrin IX treatment (Figure 1f). A slight reduction  
18 in total PARP-1 was detected in NHDF after PpIX and cisplatin (CDDP) but only  
19 CDDP induced PARP-1 cleavage in these cells. This implies that PpIX is non-  
20 genotoxic and does not affect normal cells at concentrations tested in comparison to  
21 cisplatin.

22

1 **Protoporphyrin IX induces TAp73 and its apoptotic target genes in *TP53*-null**  
2 **cancer cells**

3 To assess the potential of PpIX against other *TP53*-null human cancer cells than HCT  
4 116 p53<sup>-/-</sup>, we employed human lung adenocarcinoma cells (H1299) and human  
5 osteosarcoma cells (Saos2). The caspase assay showed potent induction of apoptosis  
6 by PpIX after 6h in all three cell lines tested (Figure 2a and Supplementary Figure  
7 1a). Induction of active caspases by PpIX correlated with the accumulation of cleaved  
8 PARP-1 in H1299 (Figure 2b).

9 TAp73 and p53 recognize the same target genes involved in the apoptotic response.  
10 We found that PpIX at the concentrations from 1 to 5 µg/ml induces accumulation of  
11 TAp73 with the concomitant upregulation of its apoptotic targets *Noxa* and *PUMA* on  
12 both mRNA and protein levels (Figure 2c,d,e). At the same time we observed the  
13 downregulation of the oncogenic  $\Delta N$  isoform of p73 (data not shown). The induction  
14 of TAp73 and its pro-apoptotic targets was also detected for Nutlin3 and cisplatin  
15 (Figure 2d and 2e, respectively). Taken together, PpIX stabilizes TAp73 and induces  
16 apoptosis in cancer cells lacking *TP53* in dose- and time-dependent manner.

17 **PpIX-activated TAp73 compensates for p53 loss in inducing apoptosis in *TP53*-**  
18 **null cancer cells**

19 To determine if TAp73 is critical for PpIX-induced cancer cells' death, we depleted  
20 TAp73 using isoform specific siRNA. PpIX had no effect on the mRNA levels of  
21 TAp73 upon the knockdown as demonstrated by real-time PCR (Figure 3a).

22 The knockdown of TAp73 led to resistance to PpIX as shown in the long-term  
23 proliferation assay (Figure 3b) and caspase assay (Supplementary Figure 2a). Next,

1 we showed that silencing of TAp73 abolished PpIX-mediated induction of Noxa and  
2 Puma as well as PARP-1 cleavage (Figure 3c, d and Supplementary Figure 2b). In  
3 addition, the knockdown of TAp73 protected from induction of PARP-1 after  
4 treatment of H1299 cells with cisplatin (Supplementary Figure 2c). Thus, our data  
5 demonstrated that PpIX-activated TAp73 compensates for p53 loss and induces  
6 cancer cells' death in the absence of p53.

### 7 **Protoporphyrin IX activates TAp73 through the disruption of TAp73/MDM2** 8 **and TAp73/MDMX complex and protein stabilization**

9 Our results showed that PpIX induces TAp73 transcriptional activity. In cancer cells,  
10 p73 transcriptional activity is abrogated, among other mechanisms, by binding to  
11 MDM2 or MDMX (human MDM4)[14]. We have shown previously that PpIX  
12 inhibits p53/MDM2 complex by binding to the N-terminal domain of p53[12]. Since  
13 PpIX also binds to p73[13] we addressed the question if PpIX abrogates interactions  
14 between TAp73 and MDM2 by using a defined yeast-based reporter system[15].  
15 Briefly, we expressed TAp73 alone or together with MDM2 or MDM4 in a yeast  
16 strain harboring a chromosomally integrated luciferase reporter containing the p53  
17 response element derived from the *PUMA* promoter. Our data manifested that PpIX  
18 restored the p73-dependent reporter in yeast strains expressing TAp73/MDM2 or  
19 p73/MDM4. This indicated that PpIX ablates TAp73/MDM2 and TAp73/MDM4  
20 interactions and promotes TAp73 transactivation function (Figure 4a). To investigate  
21 if PpIX can inhibit TAp73/MDM2(X) interactions also in cancer cells, we  
22 immunoprecipitated TAp73 after treatment with PpIX and blotted the membrane with  
23 MDM2 or MDMX antibodies. Western blot showed inhibition of TAp73/MDM2 and  
24 p73/MDMX interactions by PpIX in H1299 and HCT 116 TP53<sup>-/-</sup> cells (Figure 4b,c).

1 These findings are unexpected, since dual inhibitors of TAp73/MDM2 and  
2 TAp73/MDMX interactions have not been described to date.

3 Since TAp73 protein levels (but not mRNA levels) were upregulated by PpIX in  
4 cancer cells (Figure 2d,e), we performed pulse-chase experiments with cycloheximide  
5 (CHX) to assess whether PpIX increases the half-life of TAp73 in cancer cells. We  
6 observed that PpIX decreased the TAp73 cellular turnover (Figure 4d).

7 The key E3 ubiquitin ligase responsible for TAp73 degradation is Itch[6]. Small  
8 molecules inhibiting Itch activity in cancer cells have recently been considered to  
9 have anticancer potential[16]. We reasoned that PpIX might inhibit TAp73/Itch  
10 interactions to induce TAp73 stabilization. We then co-immunoprecipitated TAp73  
11 and demonstrated that PpIX inhibits TAp73/Itch in both H1299 and HCT TP53<sup>-/-</sup> cell  
12 lines and the inhibition was more pronounced in H1299 cells (Figure 4 c,e).

13 Taken together, our data showed that PpIX activates TAp73-dependent apoptosis at  
14 several levels, namely, by promoting its transcriptional activity and protecting from  
15 proteasomal degradation.

## 16 **Discussion**

17 It has been demonstrated that TAp73 KO mice are prone to carcinogen-induced  
18 tumorigenesis and that around 35% of mice cohort develop lung  
19 adenocarcinomas[17]. Acute genetic ablation of  $\Delta N$  isoforms triggers rapid regression  
20 of thymic lymphomas developed in p53-null mice[18]. Thus, deletion of  $\Delta Np63$  or  
21  $\Delta Np73$  can compensate for p53 tumor suppression in thymic lymphomas, and this  
22 occurs due to accumulation of TA isoforms of p63 and p73 and induction of



1 apoptosis[19]. Therefore, accumulated TAp73, similarly to p53, can be considered a  
2 promising therapeutic target in tumors deficient or mutant for *TP53* gene.

3 Cancer-related deaths are a major health problem encountered today[20]. Therefore,  
4 there is an urgent need for the development of effective oncology drugs for tailored  
5 treatment of patients suffering from the metastatic disease. The success of anti-cancer  
6 treatment relies on the strategy that allows inhibition of cancer drivers without the  
7 induction of apparent side effects. However, such strategies are still at early stage of  
8 development.

9 The p53 reactivation suppresses established tumors *in-vivo*[21], yet this strategy is not  
10 implemented therapeutically. APR-246/MQ, a compound, in Phase II clinical  
11 development (clinical trial ID: NCT03268382), that binds to cysteine residues in  
12 mutant p53 and reactivates its function[22] brings hope for patients harboring *TP53*  
13 gene mutations.

14 Given that approximately around 2/3 of all human cancers harbour *TP53* gene  
15 mutations (<https://p53.fr/>), a development of a new approach to compensate for p53  
16 loss, is of the outmost clinical relevance. Small molecules reactivating TAp73 are of  
17 a special interest. Few molecules directly or indirectly activating TAp73 in cancer  
18 cells have been described in literature. Small molecule Nutlin3, a potent inhibitor of  
19 p53/MDM2 interactions was found to activate p73 and induce p73-mediated  
20 apoptosis by disrupting p73/HDM2 association in cancer cells lacking p53[8]. Next,  
21 small molecule RETRA was described to specifically suppress mutant p53-bearing  
22 tumor cells *in vitro* and in mouse xenografts by disrupting mtp53/p73 complex[23].  
23 The widely-used genotoxic drug cisplatin (CDDP) was also shown to induce TAp73-  
24 mediated apoptosis in ovarian cancer cells irrespective of p53 status. Recent study

1 showed that TAp73 sensitizes p53-null colon cancer cells to bortezomib and TAp73  
2 was shown to compensate for p53-loss in induction of apoptosis after drug  
3 treatment[24].

4 Our previous findings showed that protoporphyrin IX binds to p53 and activates p53-  
5 dependent and independent cell death in colon cancer cells[12]. Consistently, PpIX  
6 was shown to induce cancer cell death in sarcoma cells[25]. In line with our data  
7 (Figure 1d), it was demonstrated that PpIX does not induce DNA damage but induces  
8 chromatin condensation by triggering the translocation of factors such as AIF from  
9 mitochondria to the nucleus, where it binds to the DNA and provokes caspase-  
10 independent chromatin changes[25].

11 TAp73 bears high structural and functional homology with p53. This prompted us to  
12 study if PpIX activates TAp73 in tumors lacking functional p53. Here, we showed  
13 that PpIX inhibits the growth of cancer cells lacking p53 in a dose-dependent manner.  
14 Fluorescent-based caspase assay indicated that the growth suppression resulted from  
15 induction of apoptosis. This is in line with previous study in which we observed  
16 inhibition of proliferation and the accumulation of HCT TP53<sup>-/-</sup> cells in the sub-G1  
17 fraction of the cell cycle after PpIX exposure[12].

18 Recently, detailed analysis of the oligomeric state of TAp73 alpha by Melino and  
19 Dötsch labs revealed a high structure homology between p53 and p73 tetramers[26].  
20 This shows that p73 can be pharmacologically restored in a way similar to p53. This  
21 is supported by our previous and current findings, which showed that PpIX binds to  
22 p73 and induces accumulation of TAp73 and its apoptotic targets in cancer cells in a  
23 fashion similar to p53. Using siRNA we determined that TAp73 is crucial for  
24 induction of apoptosis in cancer cells treated with PpIX. This supports the notion that

1 pharmacologically restored TAp73 behaves similarly to activated wild-type p53 and  
2 that TAp73 can compensate for p53 loss in cancer cells lacking *TP53* gene.

3 To gain better insight into the mechanism of activation of TAp73 in cancer cells by  
4 PpIX, we used a yeast-based reporter system previously developed to screen for  
5 activators of p53[15]. PpIX restored TAp73 reporter in the presence of MDM2 or  
6 MDM4, inhibitors of p73 transcriptional activity. Thus, we concluded that PpIX  
7 abrogates TAp73/MDM2 and TAp73/MDMX interactions to induce its transcriptional  
8 activation. In agreement with the above, PpIX inhibited TAp73/MDM2 and  
9 TAp73/MDMX interactions in cancer cells. This finding is novel since small-  
10 molecule, dual inhibitors of MDM2 and MDMX have not been described yet. So far  
11 only stapled peptides therapeutic ALRN-6924, targeting both MDM2 and MDMX  
12 and stabilizing wild-type p53[27] have been developed and is currently in Phase I  
13 clinical trial in wild-type p53 AML and MDS (clinical trial ID: NCT02909972). Of  
14 note, our findings have important clinical relevance since the ability to disrupt the  
15 interactions of TAp73 with both MDM2 and MDMX is a favorable therapeutic  
16 approach in tumors with MDMX amplification.

17 Since mRNA levels of p73 were not elevated by PpIX we reasoned, that the increase  
18 on the protein level must be related to the prolonged stability of TAp73 in cancer  
19 cells. Chase experiments confirmed that PpIX stabilizes TAp73 on protein level. The  
20 stabilization was a consequence of disruption of interactions between TAp73 and E3  
21 ubiquitin ligase, Itch in cancer cells.

## 22 **Conclusions**

1 Taken together, our data showed that PpIX, a metabolite of aminolevulinic acid,  
2 activates TAp73 by several mechanisms converging on activation of its  
3 transcriptional activity and protein stabilization leading to transactivation of pro-  
4 apoptotic *PUMA* and *NOXA*. Next, pharmacologically activated TAp73 compensates  
5 for p53 loss and induces apoptosis in cancer cells. Our findings, might in future lead  
6 to successful repurposing of porphyrins into clinical application to treat tumors with  
7 *TP53* gene mutations.

## 8 **Methods**

9 All experiments including protocols were performed in accordance with the  
10 guidelines and regulations of Karolinska Institute and the University of Gdansk.

### 11 *Cell culture and chemicals*

12 The p53-deficient human colon cancer cells HCT 116 *TP53*<sup>-/-</sup>[28] (a generous gift  
13 from Bert Vogelstein, Johns Hopkins Oncology Center, Baltimore, MD, USA),  
14 human non-small cell lung carcinoma cell line H1299 (ATCC) and osteosarcoma  
15 Saos2 (ATCC) cells were cultured at 37°C in a humidified incubator with 5% CO<sub>2</sub>.  
16 All cell lines were maintained in Iscove's modified Dulbecco's medium (Invitrogene,  
17 Sweden) supplemented with 1 mM sodium pyruvate and 10% FBS (Gibco, Sweden).

18 Protoporphyrin IX was purchased from Sigma-Aldrich, Germany and dissolved in  
19 100% DMSO (Sigma-Aldrich, Germany). The final concentration of DMSO in cell  
20 medium was 0.5%. Cisplatin (CDDP) (Sigma-Aldrich, Germany) was dissolved in  
21 dH<sub>2</sub>O and used at final concentration 20 μM. Nutlin (Calbiochem, Sweden) was  
22 dissolved in DMSO and used at final concentration 10 μM.

1 *DNA constructs and siRNA*

2 For ectopic expression of TAp73 $\alpha$ , we used pcDNA3.1-TAp73 $\alpha$  construct kindly  
3 provided by Prof. Matthias Dobbstein. The construct has been sequenced to confirm  
4 the fidelity of the transgene sequence. Transfection was performed with  
5 Lipofectamine™ 2000 (Invitrogen, Sweden) for 24 h according to the manufacturer's  
6 protocol.

7 The following siRNAs were used: TAp73\_318 sense:  
8 AGGGCAUGACUACAUCUGU; antisense: ACAGAUGUAGUCAUGCCCU and  
9 TAp73\_223 sense: ACCAGACAGCACCUACUUC; antisense:  
10 GAAGUAGGUGCUGUCUGGU[29]. Transfection with siRNA (10 nM) was  
11 performed with HiPerfect reagent (Qiagene, Germany) for 24 h (for WB analysis) or  
12 48 h (for colony formation assay or qPCR analysis) following manufacturer's  
13 instruction.

14 *Growth assay*

15 For short-term proliferation assay, HCT 116 TP53 $^{-/-}$  cells were seeded at  $5 \times 10^3$ /well  
16 in 96-well plate and transfected with either the empty vector or pcDNA3 containing  
17 TAP73 $\alpha$  sequence. After 24 h cells were treated with PpIX and allowed to grow for  
18 another 24 h. Cells' viability was measured by WST-1 proliferation reagent (Roche,  
19 Switzerland).

20 For a long-term colony formation assay, 3000 cells/well were seeded into twelve-well  
21 plates and treated with indicated concentrations of PpIX. The medium was changed  
22 after 3 h and cells were allowed to grow for 7 days. The colonies were stained with  
23 crystal violet reagent according to standard protocol.

1 *Quantitative PCR*

2 48 h after siRNA transfection cells were harvested, mRNA was isolated and reverse  
3 transcribed to cDNA according to the manufacturer's instructions (5 Prime, Hamburg,  
4 Germany; Invitrogen, Sweden). For qPCR, the following concentrations were used:  
5 150 nM primers; 10 ng cDNA; 7.5  $\mu$ l 2  $\times$  master mix (Bio-Rad, Sweden); water to a  
6 total of 15  $\mu$ l; Primers used: *TAP73* forward: GGGAATAATGAGGTGGTGGG and  
7 *TAP73* reverse: AGATTGAACTGGGCCATGAC, *NOXA* (PMAIP1) forward  
8 AAGTGCAAGTAGCTGGAAG, reverse: TGTCTCAAATCTCCTGAGT, *PUMA*  
9 forward: CTCAACGCACAGTACGAG and reverse:  
10 GTCCCATGAGATTGTACAG, *GAPDH* forward:  
11 TCATTTCTGGTATGACAACG and reverse: ATGTGGGCCATGAGGT

12 *Yeast-based reporter system*

13 The Tap73-dependent yeast reporter strain yLFM-PUMA containing the luciferase  
14 cDNA cloned at the *ADE2* locus and expressed under the control of PUMA promoter  
15 response element was transfected with pTSG-p73, pLS-MDM2 (derived from  
16 pRB254, generously provided by Dr. R. Brachmann, Univ. of California, Irvine, CA,  
17 USA)[15], or pLS-Ad-MDM4 and selected on double drop-out media for TRP1 and  
18 HIS3. Luciferase activity was measured 16 hrs after the shift to galactose-containing  
19 media and the addition of PpIX (Sigma-Aldrich, Germany), or DMSO. Presented are  
20 average relative light units and the standard errors obtained from three independent  
21 experiments each containing four biological repeats. Treatment with PpIX did not  
22 affect the transactivation of the reporter by Tap73 alone.

1 *Co-Immunoprecipitation and Western blotting*

2 For TAp73/Itch and TAp73/MDMX co-IP cells were treated for 24 h with 1 µg/ml  
3 PpIX and 30 µM MG-132 was added 3 hours before cell harvest. For p73/MDM2 co-  
4 IP cells were treated with PpIX or Nutlin for 24 h (HCT TP53 -/- cells). Cells for both  
5 whole cell lysates and immunoprecipitates were solubilized in lysis buffer: 25 mM  
6 Tris HCl, pH 8.0, 150 mM NaCl and 1% Nonidet P-40 (0.5% for co-IP). For co-IP, 1  
7 mg protein was immunoprecipitated with 1.5 µg of α-TAp73 rabbit polyclonal  
8 antibody (Bethyl Laboratories, TX, USA) or normal mouse IgG (Millipore, MA,  
9 USA). Immuno-complexes were absorbed onto 40 µl of Dynabeads® Protein A  
10 (Invitrogen, Sweden) for 5 h at 4°C. The immunoprecipitates were washed with 1 mL  
11 of lysis buffer. The antibodies used for detection were: anti-p73 monoclonal  
12 antibodies[18] (IMG 246, Imgenex, UK), anti-MDM2 (Santa Cruz, Germany), anti-  
13 Itch (Calbiochem, Sweden), anti-MDMX (Bethyl Laboratories, TX, USA).

14 Western Blot was performed according to the standard protocol. 100 µg of total cell  
15 lysate was subjected to electrophoresis and the following antibodies were used to  
16 detect proteins: anti-TAp73 (Bethyl Laboratories, TX, USA), anti-Bax (Santa Cruz,  
17 Germany) anti-PUMA (Cell Signaling), anti-Noxa (Calbiochem, Sweden), anti-  
18 PARP1/2 (Santa Cruz, Germany), anti-actin (Sigma-Aldrich, Germany).

19 *Caspase activation assay*

20 Activation of caspases by PpIX was measured with FAM-FLICA™ Poly Caspase  
21 Assay Kit (ImmunoChemistry Technologies, Germany) according to manufacturer's  
22 protocol. Caspase activation was monitored by the means of flow cytometry with BD  
23 FacsCalibur after 6 h treatment with PpIX.

1 *Protein stability assay*

2 H1299 cells were pre-treated with 1 µg/ml PpIX for 1 h and translation was inhibited  
3 by adding cycloheximide (Sigma Aldrich, Germany) to final concentration 30 µg/ml.  
4 Cells were harvested 2, 4, 6 and 8 h after addition of CHX and subjected to Western  
5 blot analysis.

6 *Comet assay*

7 HCT TP53 <sup>-/-</sup> cells were seeded into 24-well plates and treated with PpIX (1 µg/ml  
8 and 5 µg/ml), H<sub>2</sub>O<sub>2</sub> (100 µM) was used as a positive control. Following treatment,  
9 cells were pelleted by centrifugation at 1500 rpm and suspended in 60 µl of PBS (pH  
10 7.4). 10 µl of cell suspension was mixed with 100 µl of 1% low melting agarose  
11 (Prona, Reducta LM, Poland) and 75 µl of this cell–agarose mixture was spread on  
12 microscopic slides pre-coated with 1% agarose. A third layer of 0.5% low melting  
13 agarose (75 µl) was applied over the layer of agarose with the cell suspension. Slides  
14 were incubated for 1 h in a lysis solution (2.5 M NaCl, 100 mM EDTA, 100 mM Tris,  
15 1% Triton X- 100, pH 10). The microscopic slides were immersed in an alkaline  
16 buffer (300 mM NaOH, 1 mM disodium EDTA) for 30 min after which they were  
17 subjected to electrophoresis at 1V/cm for 15 min. Subsequently slides were  
18 neutralized with a neutralization buffer (0.4 M Tris, pH 7.5) for 15 min and stained  
19 with ethidium bromide (20 µg/ml). Cells were analyzed under a fluorescence  
20 microscope (Nikon PCM-2000) using Cometscore® software. Images of 20 cells  
21 from three slides were analyzed. Densities were measured for each image in two  
22 areas: the whole cellular DNA and the area containing only the comet head. Results  
23 are presented as tail moment, which is the percentage of DNA in the comet tail  
24 multiplied by the tail length.



1 *Statistical analysis*

2 Yeast assay was performed in 3 independent experiments with 3 triplicates.  $P < 0.05$   
3 was considered statistically relevant. The statistical significance was assessed by a  
4 parametric Student's t test (for variances Fisher–Snedecor's test was applied and the  
5 normality was estimated with the Shapiro–Wilk's test).

6 **Abbreviations:**

7 **TA** - transcriptionally active; **PpIX** – protoporphyrin IX; **CDDP** – cisplatin; **CXH** –  
8 cycloheximide

9 **Conflict of interests**

10 Authors declare no conflict of interests.

11 **Data availability:**

12 Not applicable.

13 **Authors' contribution:**

14 A.S., A.K., A.K., P.A., M.L., prepared figures and drafted the manuscript; J.ZP. and  
15 A.I., designed the study, wrote and revised the manuscript. All authors read and  
16 approved the final version of the manuscript.

17 **Acknowledgement**

18 Research was funded by the grant from the Polish National Science Center no  
19 6126/B/P01/2010/38 NN405612638, Karolinska Institute and Stockholm Läns  
20 Landsting, Åke Wibergs stiftelse, IARC IG grant (#12869), the Strategic Research

1 Programe in Cancer (StratCan) and ETIUDA grant. JZP would like to acknowledge  
2 the award for Young Talented Scientist from Polish Ministry of Science and Higher  
3 Education. We thank Prof. G. Selivanova, Karolinska Institute, for scientific  
4 discussions. Thanks are addressed to Katarzyna Koczergo for a technical support. We  
5 also thank all our colleagues for sharing their reagents.

6

## 7 **Figure legends**

### 8 **Figure 1. PpIX inhibits proliferation of cancer cells lacking p53.**

9 (a) PpIX induces dose-dependent growth inhibition in a long-term proliferation assay.

10 (b) Ectopic expression of TAp73 $\alpha$  sensitizes cells to PpIX after 24 h as demonstrated  
11 by WST-1 proliferation assay. Inserted blot represents the level of expression of  
12 TAp73 $\alpha$ . Please note that the blot has been cropped. Dotted line represents where the  
13 blot has been cut. The uncropped full length version is presented in Suppl. Fig. 3a.

14 (c) TAp73 $\alpha$  overexpression sensitizes H1299 to PpIX-induced inhibition of  
15 proliferation.

16 (d, e) PpIX does not induce DNA damage in cancer cells at effective therapeutic  
17 concentrations.

18 (f) PpIX induces PARP-1 cleavage in HCT 116 p53 $^{-/-}$  but not in non-transformed  
19 human diploid fibroblasts. Dotted line represents where the blot has been cut. The  
20 uncropped blot is presented in Suppl. Fig. 3b.

21

1 **Figure 2. PpIX induces apoptosis and activates TAp73 in p53-null cancer cells.**

2 (a) PpIX induces caspases as shown by the increase in the fluorescent signal in p53-  
3 null HCT 116 p53<sup>-/-</sup> and H1299 cancer cells.

4 (b) PARP-1 cleavage in H1299 cells is induced by PpIX after 48 h treatment.

5 (c) mRNA levels of *NOXA* and *PUMA* in H1299 cells treated are elevated with 1  
6  $\mu\text{g/ml}$  PpIX after 12h.

7 (d, e) PpIX induces TAp73 and its proapoptotic targets in H1299 (d) and HCT 116  
8 *TP53*<sup>-/-</sup> (e) cancer cells. 20  $\mu\text{M}$  CDDP and 10  $\mu\text{M}$  Nutlin were used as positive  
9 controls for induction of p73. The uncropped blots for figure (d) are presented in  
10 Suppl. Fig. 4a.

11 **Figure 3. TAp73 knockdown protects cancer cells from PpIX-induced cell death.**

12 (a) TAp73 knockdown with siRNA in H1299 cells as confirmed by qPCR. mRNA  
13 levels of TAp73 are not affected by PpIX.

14 (b) TAp73 knockdown protects from PpIX-induced growth inhibition in H1299 cells.

15 (c, d) Ablation of TAp73 protects from induction of proapoptotic target Noxa by  
16 PpIX on mRNA (c) and protein levels (d).

17 **Figure 4. PpIX ablates TAp73/MDM2, TAp73/MDMX and TAp73/Itch**  
18 **complexes.**

19 (a) PpIX rescues transcriptional activity of TAp73 thorough ablation of  
20 TAp73/MDM2 and TAp73/MDM4 interactions as assessed by yeast-based reporter

1 system. The *t*-student test was performed for statistical analysis with  $p \leq 0.05$ . \*  
2 samples are considered statistically significant.

3 (b, c) Disruption of TAp73/MDM2 (b) and TAp73/MDMX and TAp73/Itch (c)  
4 binding by PpIX is shown in co-immunoprecipitation experiment in HCT 116 p53-/-  
5 cells. Uncropped blots are presented in Suppl. Fig. 5a and 5b. N - Nutlin

6 (d) Chase experiment demonstrates stabilization of TAp73 by 1  $\mu\text{g/ml}$  PpIX in  
7 H1299. NT-not treated control

8 (e) TAp73/Itch interaction is inhibited by PpIX in H1299 by 1  $\mu\text{g/ml}$  PpIX. The  
9 uncropped blots are shown in Suppl. Fig. S6a.

10

11

12

13

14

15

16

17

18

19

## 1   **References**

- 2   1.    Gyawali B, Pantziarka P, Crispino S, Bouche G: **Does the oncology**  
3       **community have a rejection bias when it comes to repurposed drugs?**  
4       *Ecancermedalscience* 2018, **12**:ed76.
- 5   2.    Dotsch V, Bernassola F, Coutandin D, Candi E, Melino G: **p63 and p73, the**  
6       **ancestors of p53.** *Cold Spring Harbor perspectives in biology* 2010,  
7       **2(9):a004887.**
- 8   3.    Tomasini R, Mak TW, Melino G: **The impact of p53 and p73 on aneuploidy**  
9       **and cancer.** *Trends in cell biology* 2008, **18(5):244-252.**
- 10  4.    Irwin MS, Kondo K, Marin MC, Cheng LS, Hahn WC, Kaelin WG, Jr.:  
11       **Chemosensitivity linked to p73 function.** *Cancer cell* 2003, **3(4):403-410.**
- 12  5.    Wu H, Leng RP: **MDM2 mediates p73 ubiquitination: a new molecular**  
13       **mechanism for suppression of p73 function.** *Oncotarget* 2015.
- 14  6.    Rossi M, De Laurenzi V, Munarriz E, Green DR, Liu YC, Vousden KH,  
15        Cesareni G, Melino G: **The ubiquitin-protein ligase Itch regulates p73**  
16       **stability.** *EMBO J* 2005, **24(4):836-848.**
- 17  7.    Zhang P, Liu SS, Ngan HY: **TAp73-mediated the activation of c-Jun N-**  
18       **terminal kinase enhances cellular chemosensitivity to cisplatin in ovarian**  
19       **cancer cells.** *PloS one* 2012, **7(8):e42985.**
- 20  8.    Lau LM, Nugent JK, Zhao X, Irwin MS: **HDM2 antagonist Nutlin-3**  
21       **disrupts p73-HDM2 binding and enhances p73 function.** *Oncogene* 2008,  
22       **27(7):997-1003.**
- 23  9.    Kostecka A, Sznarkowska A, Meller K, Acedo P, Shi Y, Mohammad Sakil  
24        HA, Kawiak A, Lion M, Krolicka A, Wilhelm M *et al*: **JNK-NQO1 axis**

- 1           **drives TAp73-mediated tumor suppression upon oxidative and**  
2           **proteasomal stress. *Cell death & disease* 2014, 5:e1484.**
- 3    10.    Agostinis P, Berg K, Cengel KA, Foster TH, Girotti AW, Gollnick SO, Hahn  
4           SM, Hamblin MR, Juzeniene A, Kessel D *et al*: **Photodynamic therapy of**  
5           **cancer: an update. *CA: a cancer journal for clinicians* 2011, 61(4):250-281.**
- 6    11.    Bednarz N, Zawacka-Pankau J, Kowalska A: **Protoporphyrin IX induces**  
7           **apoptosis in HeLa cells prior to photodynamic treatment.**  
8           *Pharmacological reports : PR* 2007, 59(4):474-479.
- 9    12.    Zawacka-Pankau J, Issaeva N, Hossain S, Pramanik A, Selivanova G,  
10           Podhajska AJ: **Protoporphyrin IX interacts with wild-type p53 protein in**  
11           **vitro and induces cell death of human colon cancer cells in a p53-**  
12           **dependent and -independent manner. *J Biol Chem* 2007, 282(4):2466-2472.**
- 13   13.    Sznarkowska A, Malenczyk K, Kadzinski L, Bielawski KP, Banecki B,  
14           Zawacka-Pankau J: **Targeting of p53 and its homolog p73 by**  
15           **protoporphyrin IX. *FEBS letters* 2011, 585(1):255-260.**
- 16   14.    Wang X, Arooz T, Siu WY, Chiu CH, Lau A, Yamashita K, Poon RY:  
17           **MDM2 and MDMX can interact differently with ARF and members of**  
18           **the p53 family. *FEBS letters* 2001, 490(3):202-208.**
- 19   15.    Andreotti V, Ciribilli Y, Monti P, Bisio A, Lion M, Jordan J, Fronza G,  
20           Menichini P, Resnick MA, Inga A: **p53 transactivation and the impact of**  
21           **mutations, cofactors and small molecules using a simplified yeast-based**  
22           **screening system. *PloS one* 2011, 6(6):e20643.**
- 23   16.    Rossi M, Rotblat B, Ansell K, Amelio I, Caraglia M, Misso G, Bernassola F,  
24           Cavasotto CN, Knight RA, Ciechanover A *et al*: **High throughput screening**  
25           **for inhibitors of the HECT ubiquitin E3 ligase ITCH identifies**

- 1            **antidepressant drugs as regulators of autophagy.** *Cell death & disease*  
2            2014, **5**:e1203.
- 3    17.    Tomasini R, Tsuchihara K, Wilhelm M, Fujitani M, Rufini A, Cheung CC,  
4            Khan F, Itie-Youten A, Wakeham A, Tsao MS *et al*: **TAp73 knockout shows**  
5            **genomic instability with infertility and tumor suppressor functions.** *Genes*  
6            *& development* 2008, **22**(19):2677-2691.
- 7    18.    Venkatanarayan A, Raulji P, Norton W, Chakravarti D, Coarfa C, Su X,  
8            Sandur SK, Ramirez MS, Lee J, Kingsley CV *et al*: **IAPP-driven metabolic**  
9            **reprogramming induces regression of p53-deficient tumours in vivo.**  
10           *Nature* 2015, **517**(7536):626-630.
- 11   19.    Venkatanarayan A, Raulji P, Norton W, Flores ER: **Novel therapeutic**  
12           **interventions for p53-altered tumors through manipulation of its family**  
13           **members, p63 and p73.** *Cell Cycle* 2015:0.
- 14   20.    Global Burden of Disease Cancer C, Fitzmaurice C, Akinyemiju TF, Al Lami  
15           FH, Alam T, Alizadeh-Navaei R, Allen C, Alsharif U, Alvis-Guzman N,  
16           Amini E *et al*: **Global, Regional, and National Cancer Incidence,**  
17           **Mortality, Years of Life Lost, Years Lived With Disability, and Disability-**  
18           **Adjusted Life-Years for 29 Cancer Groups, 1990 to 2016: A Systematic**  
19           **Analysis for the Global Burden of Disease Study.** *JAMA oncology* 2018.
- 20   21.    Ventura A, Kirsch DG, McLaughlin ME, Tuveson DA, Grimm J, Lintault L,  
21           Newman J, Reczek EE, Weissleder R, Jacks T: **Restoration of p53 function**  
22           **leads to tumour regression in vivo.** *Nature* 2007, **445**(7128):661-665.
- 23   22.    Zhang Q, Bykov VJN, Wiman KG, Zawacka-Pankau J: **APR-246 reactivates**  
24           **mutant p53 by targeting cysteines 124 and 277.** *Cell death & disease* 2018,  
25           **9**(5):439.

- 1 23. Kravchenko JE, Ilyinskaya GV, Komarov PG, Agapova LS, Kochetkov DV,  
2 Strom E, Frolova EI, Kovriga I, Gudkov AV, Feinstein E *et al*: **Small-**  
3 **molecule RETRA suppresses mutant p53-bearing cancer cells through a**  
4 **p73-dependent salvage pathway.** *Proc Natl Acad Sci U S A* 2008,  
5 **105(17):6302-6307.**
- 6 24. Dabiri Y, Kalman S, Gurth CM, Kim JY, Mayer V, Cheng X: **The essential**  
7 **role of TAp73 in bortezomib-induced apoptosis in p53-deficient colorectal**  
8 **cancer cells.** *Scientific reports* 2017, **7(1):5423.**
- 9 25. Li Q, Wang X, Zhang K, Li X, Liu Q, Wang P: **DNA damage and cell cycle**  
10 **arrest induced by protoporphyrin IX in sarcoma 180 cells.** *Cellular*  
11 *physiology and biochemistry : international journal of experimental cellular*  
12 *physiology, biochemistry, and pharmacology* 2013, **32(3):778-788.**
- 13 26. Luh LM, Kehrhoesser S, Deutsch GB, Gebel J, Coutandin D, Schafer B,  
14 Agostini M, Melino G, Dotsch V: **Analysis of the oligomeric state and**  
15 **transactivation potential of TAp73alpha.** *Cell Death Differ* 2013,  
16 **20(8):1008-1016.**
- 17 27. Carvajal LA, Neriah DB, Senecal A, Benard L, Thiruthuvanathan V, Yatsenko  
18 T, Narayanagari SR, Wheat JC, Todorova TI, Mitchell K *et al*: **Dual**  
19 **inhibition of MDMX and MDM2 as a therapeutic strategy in leukemia.**  
20 *Science translational medicine* 2018, **10(436).**
- 21 28. Bunz F, Dutriaux A, Lengauer C, Waldman T, Zhou S, Brown JP, Sedivy JM,  
22 Kinzler KW, Vogelstein B: **Requirement for p53 and p21 to sustain G2**  
23 **arrest after DNA damage.** *Science* 1998, **282(5393):1497-1501.**
- 24 29. Stantic M, Sakil HA, Zirath H, Fang T, Sanz G, Fernandez-Woodbridge A,  
25 Marin A, Susanto E, Mak TW, Arsenian Henriksson M *et al*: **TAp73**



1           **suppresses tumor angiogenesis through repression of proangiogenic**  
2           **cytokines and HIF-1alpha activity.** *Proc Natl Acad Sci U S A* 2015,  
3           **112(1):220-225.**

4

Figure 1

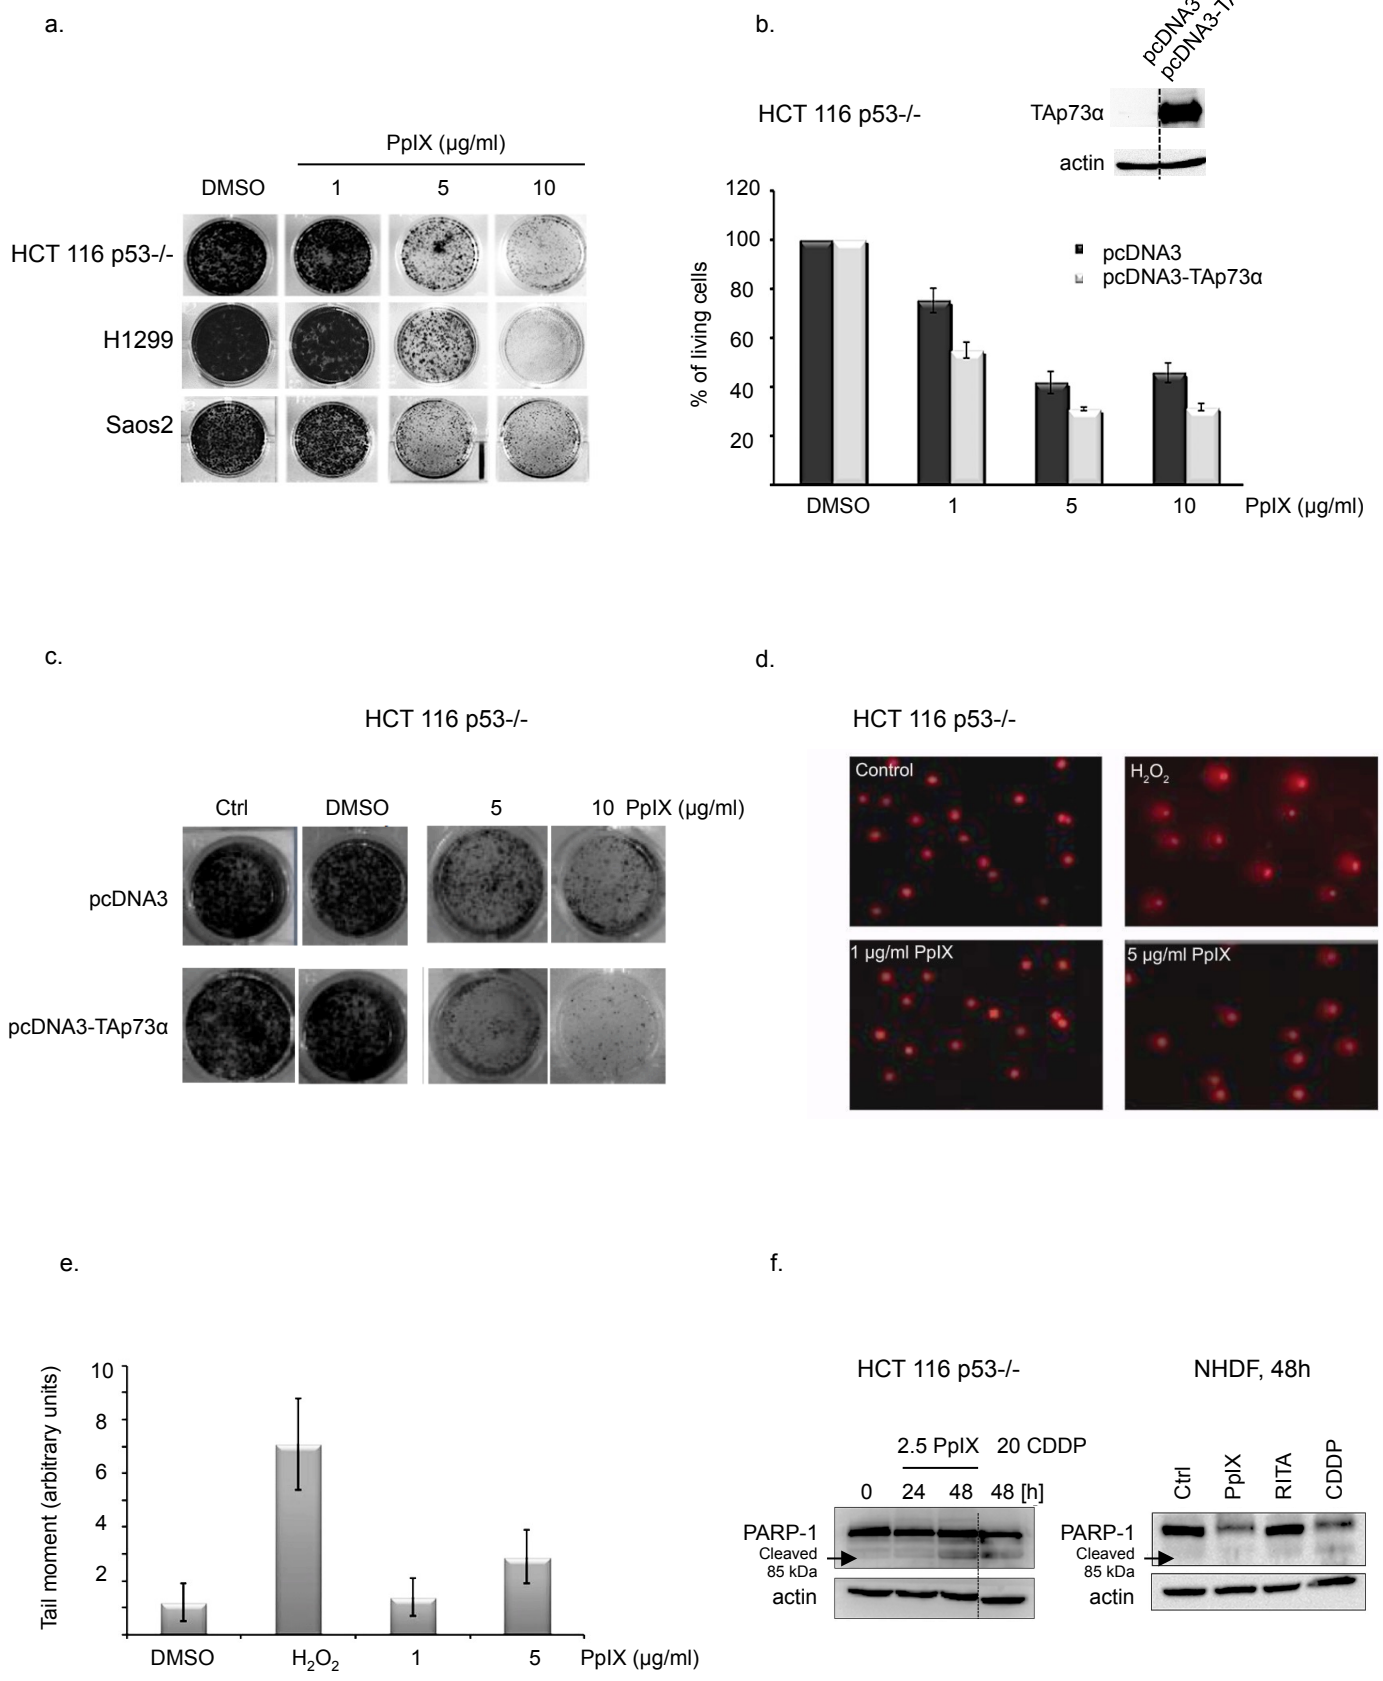

Figure 2

a.

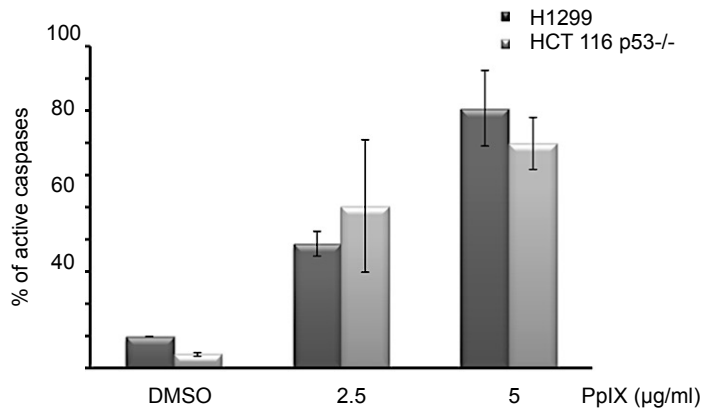

b.

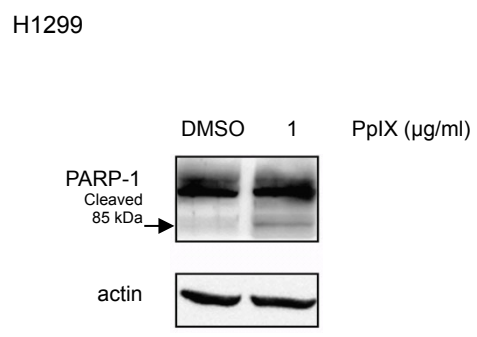

c.

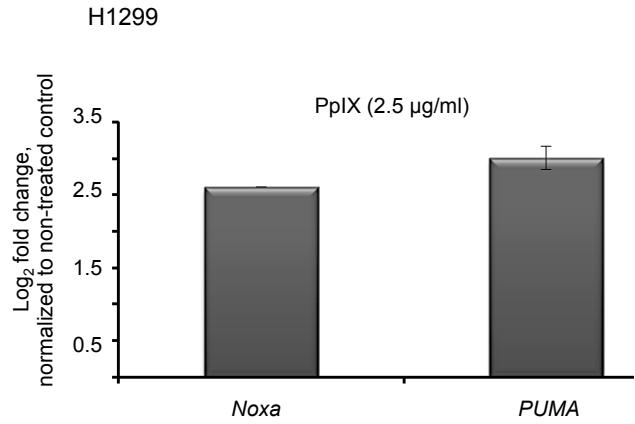

d.

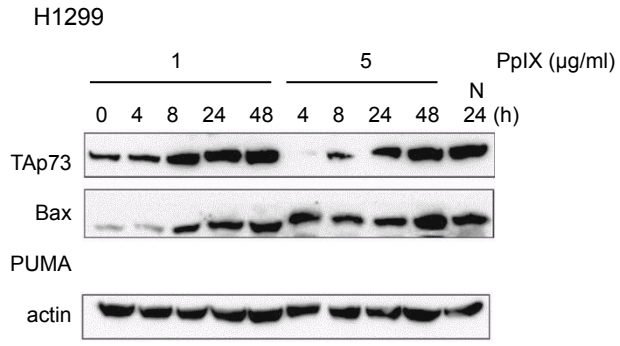

e.

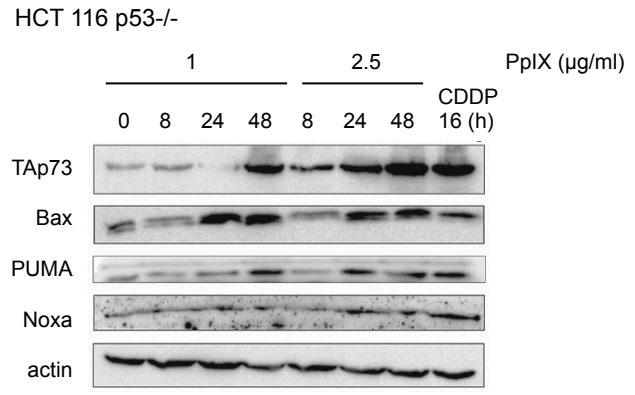

Figure 3

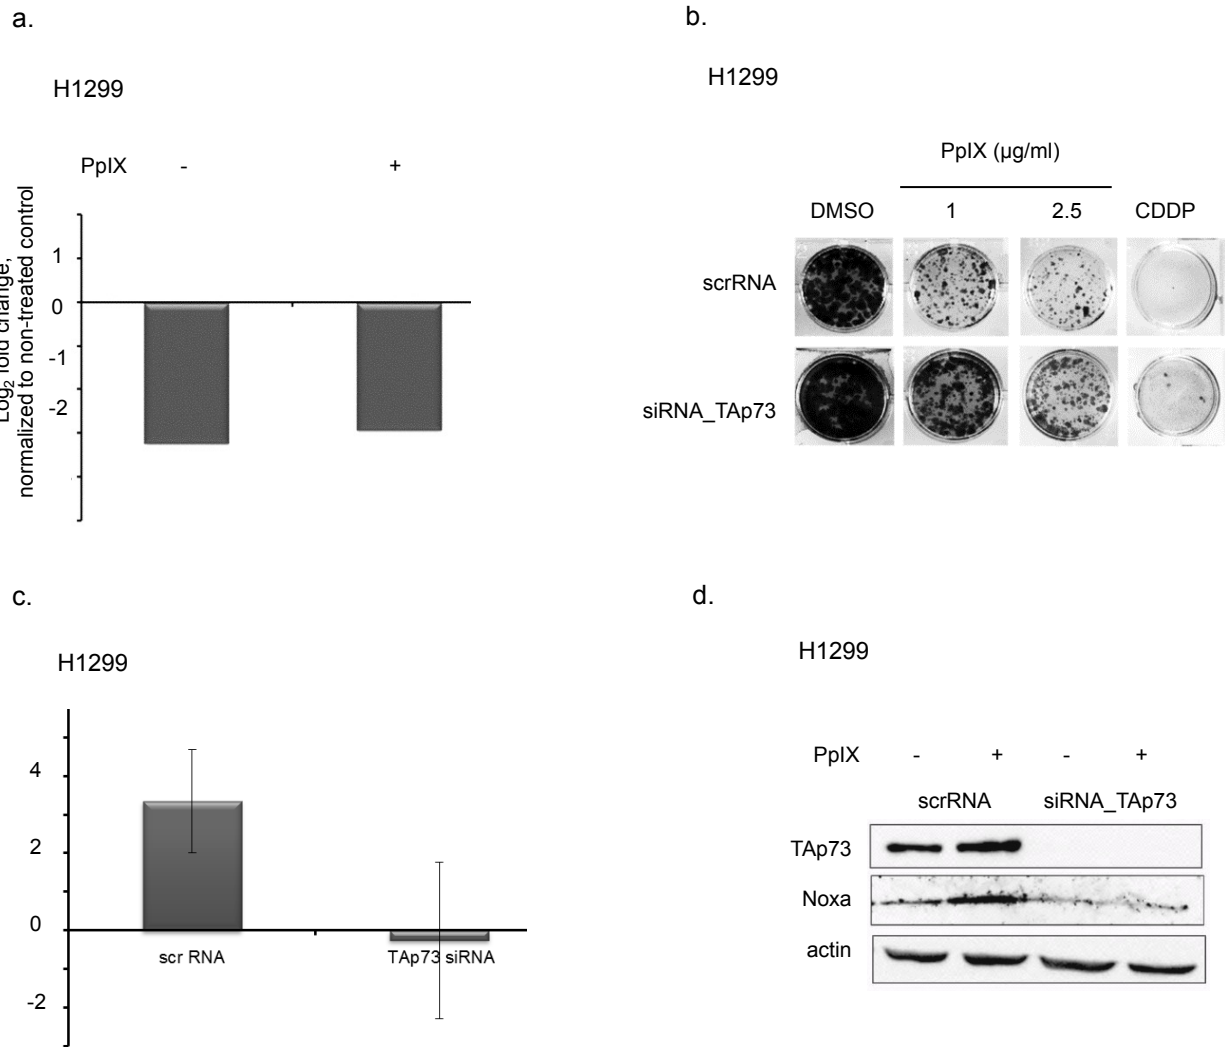

Figure 4

a.

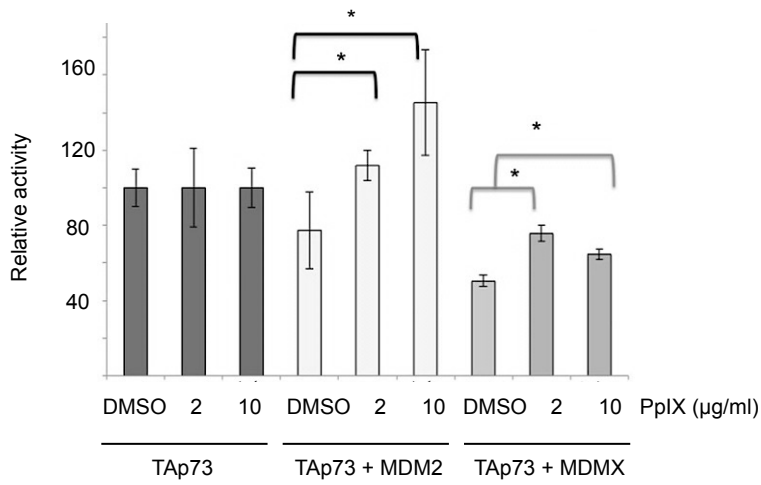

b.

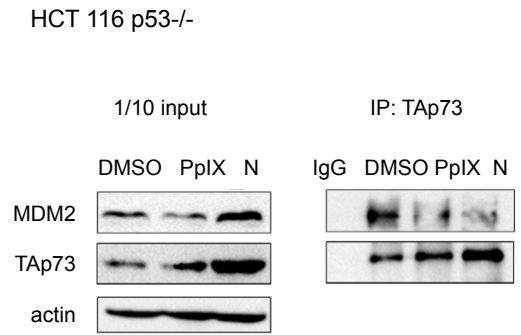

c.

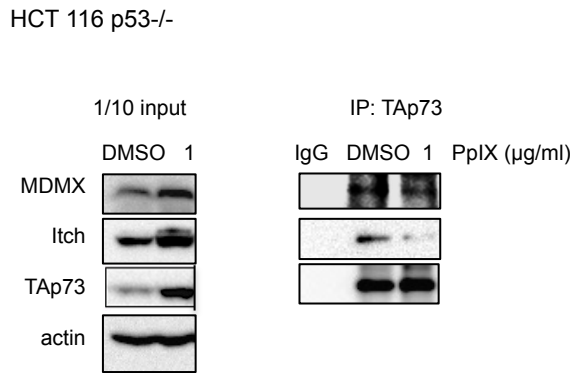

d.

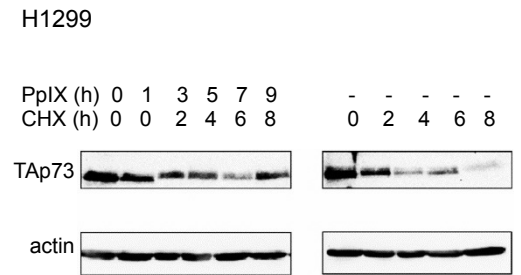

e.

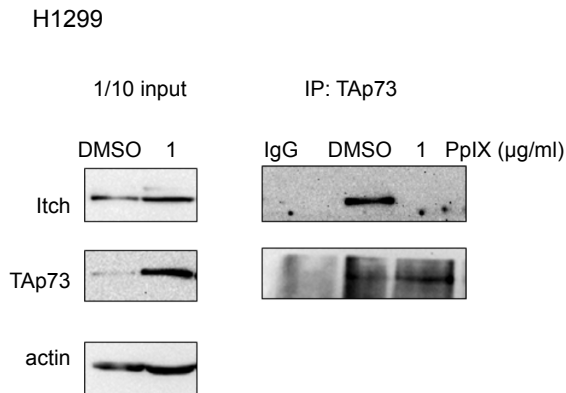

Source: https://www.biorxiv.org/content/10.1101/357293v3.full.pdf
